# Supplementary material
Source: PubMed Central journal article supplement (PMC6871310)
Supplement: 10.1182-2019001234_bloodbld2019001234-suppl1.pdf [file 10.1182-2019001234_bloodbld2019001234-suppl1.pdf]

## Supplemental Materials and Methods

### *CUT&RUN-seq*

Protein A-MNase was kindly provided by Dr. Steven Henikoff (Fred Hutchinson Cancer Research Center, Seattle, WA, USA). One million erythroblasts were sorted from wild-type and *Gata1s* embryos for analysis of GATA1 and GATA1s chromatin occupancy and half million erythroblasts were collected for H3K27me3 analysis. Briefly, nuclei were isolated in NE buffer (20 mM HEPES-KOH, pH 7.9, 10 mM KCl, 0.5 mM spermidine, 0.1% Triton X-100, 20% Glycerol and protease inhibitor cocktails from Roche), captured with BioMag Plus Concanavalin A (Polysciences, 86057-3) in binding buffer (20 mM HEPES-KOH, pH 7.9, 10 mM KCl, 1 mM CaCl<sub>2</sub>, 1 mM MnCl<sub>2</sub> and protease inhibitor cocktails from Roche) and incubated with primary antibodies in wash buffer (20 mM HEPES-KOH, pH 7.5, 150 mM NaCl, 0.5 mM spermidine, 0.1% BSA and protease inhibitor cocktails from Roche) for 2 hours at 4°C with rotation. Antibodies included anti-GATA1/GATA1s (Abcam, ab11852, 1:100), anti-H3K27me3 (Millipore, 07-449, 1:100) and rabbit control IgG (Abcam, ab46540). After washing the nuclei twice with wash buffer, pA-MNase was added at 1:400 (Batch #6) and incubated for 1 hour at 4°C. Digestion was carried out on ice water. CaCl<sub>2</sub> was then added to a final concentration of 2 mM to activate pA-MNase. The digestion time was 15 minutes for GATA1/GATA1s and 10 minutes for H3K27me3. The reaction was stopped by addition of equal volume of 2x STOP buffer (200 mM NaCl, 20 mM EDTA, 4 mM EGTA, 50 µg/mL RNase A and 40 µg/mL glycogen). DNA was released into the supernatant and extracted using Phenol/Chloroform.

A modified protocol of NEBNext Ultra II DNA Library Prep Kit for Illumina (NEB, E7645) was used to prepare the CUT&RUN-seq library. Briefly, the dA-tailing temperature was decreased to 50°C, and the reaction time was increased to 1 hour to compensate for lower enzymatic activity. Next, 2.1x AMPure XP beads (Beckman, A63881) were added for cleanup of adaptor-ligated DNA without size selection. After PCR amplification, the reaction was cleaned up with AMPure XP beads.

We applied an *in-house* shell script to process the sequencing data. Briefly, TrimGalore ([http://www.bioinformatics.babraham.ac.uk/projects/trim\\_galore/](http://www.bioinformatics.babraham.ac.uk/projects/trim_galore/)) was used to remove adaptor sequence. We applied Bowtie 2<sup>1</sup> to align reads to the reference genome (UCSC mm9). We used MACS1.4<sup>2</sup> to call the binding peaks. P values of differentially enriched binding peaks between wild type and *Gata1s* were calculated using DESeq2<sup>3</sup>.

### *ATAC-seq*

ATAC-seq reactions were performed as previous described<sup>4</sup>, but the time for transposase reaction was increased to 30 minutes. Paired-end sequences were merged and aligned to the mouse reference genome (UCSC mm9). We used TrimGalore to remove adaptor sequence and applied Bowtie 2 to align reads of the ATAC-seq samples to the reference genome (UCSC mm9). We used MACS1.4 to call the binding peaks. P-values of differentially enriched ATAC-seq peaks between wild type and *Gata1s* were calculated using DESeq2. Peaks with at least 10 reads within the called peak region were ordered by log<sub>2</sub>-transformed fold change statistics according to DESeq2 for downstream analysis. GSEA analysis was applied in weighted mode against the gene sets collection in MSigDB (v5.1)<sup>5</sup>. Gene sets with size over 5,000 genes or smaller than 10 genes were excluded for further analysis. Each gene set was permuted 1,000 times to calculate P value and FDR values. The ChIPSeq profiles and heatmaps (Figure 3B) are drawn with fluff bandplot and heatmap function with default parameters<sup>6</sup>.

### *Flow cytometry, sorting and intracellular staining of RUNX1*

Cells were suspended in sterile FACS buffer (PBS, 0.5% BSA, 2 mM EDTA) and stained with indicated surface markers for 30 minutes at 4°C, then sorted R1/2 (CD71<sup>hi</sup>Ter119<sup>neg/med</sup>) and R3 (CD71<sup>hi</sup>Ter119<sup>hi</sup>) populations of erythroblasts using a FACS Aria IIu (BD). All flow cytometry analysis was performed on a BD LSR II flow cytometer, and the results were analyzed using FlowJo. Antibodies included c-kit-APC-eFluor 450 (eBioscience, 48-1171-80, 1:100), Ter119-APC (BioLegend, 116212, 1:100), CD41-PE/Cy7 (Biolegend, 133916, 1:100), CD42-DyLight 649 (Emfret Analytics, M040-3, 1:10), CD16/32-PerCP-Cy5.5 (BD Biosciences, 560540, 1:100), CD71-PE (BD Biosciences, 553267, 1:100). For intracellular staining of RUNX1, cells were stained with surface markers as above, fixed with 4% formaldehyde in PBS and stained with RUNX-PE (eBioscience, 12-9816-80) in Saponin buffer (1% BSA and 0.05% saponin in PBS) for 1 hour at 4°C.

### *Western blot*

Lysates from human CD34<sup>+</sup> erythroid differentiation were provided by Amittha Wickrema (University of Chicago, Chicago, IL, USA). Fetal liver cell lysates and G1-ER cell lysates were prepared according to standard methods, fractionated on NuPAGE Bis-Tris protein gels (Invitrogen, NP0335BOX), and transferred to Immobilon-P PVDF Membranes (Millipore, IPVH00010) membranes. Antibodies included anti-GATA1/GATA1s (Abcam, ab11852, 1:1,000), HSC70 (Santa Cruz Biotechnology Inc., sc-7298, 1:1,000), RUNX1 (Santa Cruz Biotechnology

Inc., sc-365644, 1:1,000), H3 (Abcam, ab1791, 1:1,000), H4 (Abcam, ab10158, 1:1,000), H3K9me3 (Abcam, ab8898, 1:1,000) and H3K27me3 (Millipore, 07-449, 1:1,000 and ABE44, 1:1000). Membranes were incubated with primary antibodies and HRP-conjugated secondary antibodies, then developed by ECL (Amersham). Band intensities were quantified using ImageJ software.

## References

1. Langmead B, Salzberg SL. Fast gapped-read alignment with Bowtie 2. *Nat Methods*. 2012;9(4):357-359.
2. Zhang Y, Liu T, Meyer CA, et al. Model-based analysis of ChIP-Seq (MACS). *Genome Biol*. 2008;9(9):R137.
3. Love MI, Huber W, Anders S. Moderated estimation of fold change and dispersion for RNA-seq data with DESeq2. *Genome Biol*. 2014;15(12).
4. Volk A, Liang K, Suraneni P, et al. A CHAF1B-Dependent Molecular Switch in Hematopoiesis and Leukemia Pathogenesis. *Cancer Cell*. 2018;34(5):707-723 e707.
5. Godec J, Tan Y, Liberzon A, et al. Compendium of Immune Signatures Identifies Conserved and Species-Specific Biology in Response to Inflammation. *Immunity*. 2016;44(1):194-206.
6. Georgiou G, van Heeringen SJ. fluff: exploratory analysis and visualization of high-throughput sequencing data. *PeerJ*. 2016;4:e2209.

## Supplemental Figure Legends

**Figure S1. Erythroid phenotype of *Gata1s* embryos.** (A) Representative flow cytometry plots assessment of erythropoiesis in E12.5 fetal livers using antibodies against CD71 and Ter119. Fetal liver cells were divided into subsets R0 to R5 containing increasingly-mature erythroblasts. (B) Bar graph depicting mean ( $\pm$  SD) percentages of R1 to R5 populations from experiments in (A),  $N \geq 3$ . (C) Representative dot plots showing the frequencies of immature megakaryocytes (CD41<sup>+</sup>CD42<sup>-</sup>) and mature megakaryocytes (CD41<sup>+</sup>CD42<sup>+</sup>) in fetal livers from WT or G1s E12.5 embryos. (D) Flow cytometry assessment of the maturing erythroid populations in E13.5 fetal liver from WT and G1s embryos. (E) Bar graph depicting mean ( $\pm$  SD) percentages of R1 to R5 populations from experiments in (D),  $N \geq 3$ . (F) Mean ( $\pm$  SD) percentages (left) and total cell numbers per fetal liver of R1/2/3 (R1-3) erythroblasts from E13.5 embryos. Individual values for biological replicates are shown. (G) Bar graph depicting mean ( $\pm$  SD) percentages of R1 to R5 populations from E14.5 WT and G1s as determined by flow cytometry,  $N \geq 3$ . (H) Numbers of burst-forming unit-erythroid (BFU-E) from 30,000 Ter119-depleted WT or G1s fetal liver cells (E13.5). Individual values for three replicates are shown. Middle bar depicts averages, upper and lower bars depict SD. (I) Numbers of colony-forming unit (CFU-E) from 20,000 Ter119-depleted WT or G1s fetal liver cells (E13.5). Individual values for three replicates are shown. Middle bar depicts averages, upper and lower bars depict SD. (J) Photos of the representative CFU-E colonies from WT or G1s fetal liver cells cultured in methylcellulose-based medium. Images were collected on a Bio-Rad ZOE fluorescent cell imager. n.s. = not significant, \* $P \leq 0.05$ , \*\* $P \leq 0.01$ , \*\*\* $P \leq 0.001$ , \*\*\*\* $P \leq 0.0001$  (unpaired Student's *t*-test).

**Figure S2. Enriched pathways of genes nearest to sites that were gained or lost by GATA1s as determined by GSEA.** X-axis indicates the statistical significance measured by  $-\log_{10}$ -transformed FDR (False Discovery Rate).

**Figure S3. mTORC1, hypoxia and cell cycle related pathways are enriched in *Gata1s* fetal liver erythroblasts.** Gene set enrichment analysis (GSEA) of differentially expressed genes from WT R1/2 versus G1s R1/2 (A) or WT R3 versus G1s R3 (B) from RNA-seq. NES, Normalized Enrichment Score; FDR, False Discovery Rate.

**Figure S4. Gene ontology analysis of genes that are differentially expressed and methylated at H3K27.** X-axis indicates the statistical significance measured by  $-\log_{10}$ -transformed FDR (False Discovery Rate).

**Figure S5. Generation of *Gata1s/Gata2*<sup>het</sup> double transgenic mice.** *Gata2*<sup>het</sup> mice were mated with *Gata1s* hemizygous or homozygous mice to generate *Gata1/Gata2*, *Gata1/Gata2*<sup>het</sup>, *Gata1s/Gata2* and *Gata1s/Gata2*<sup>het</sup> mice. ♀ female, ♂ male.

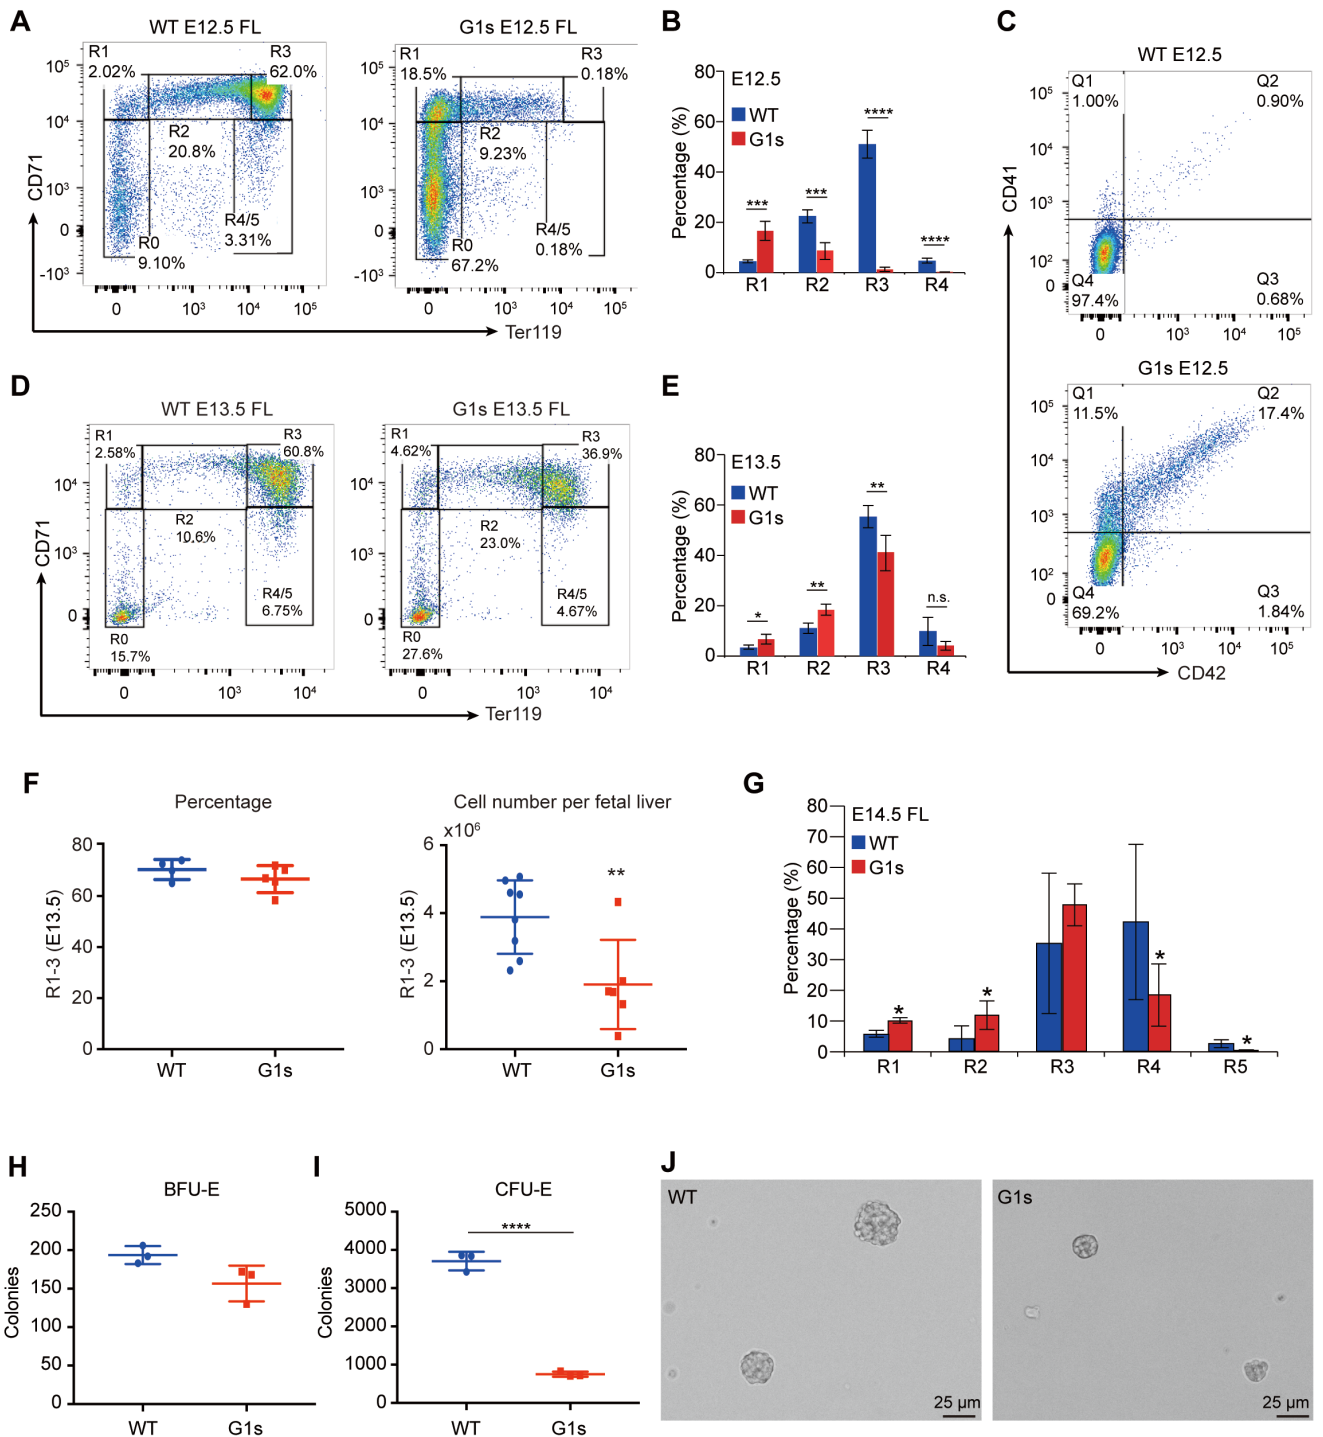

Supplemental Figure S1

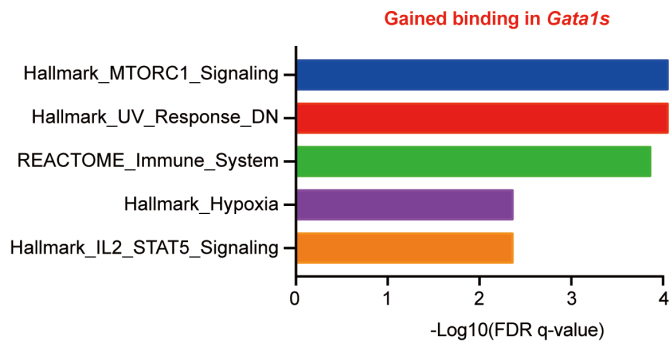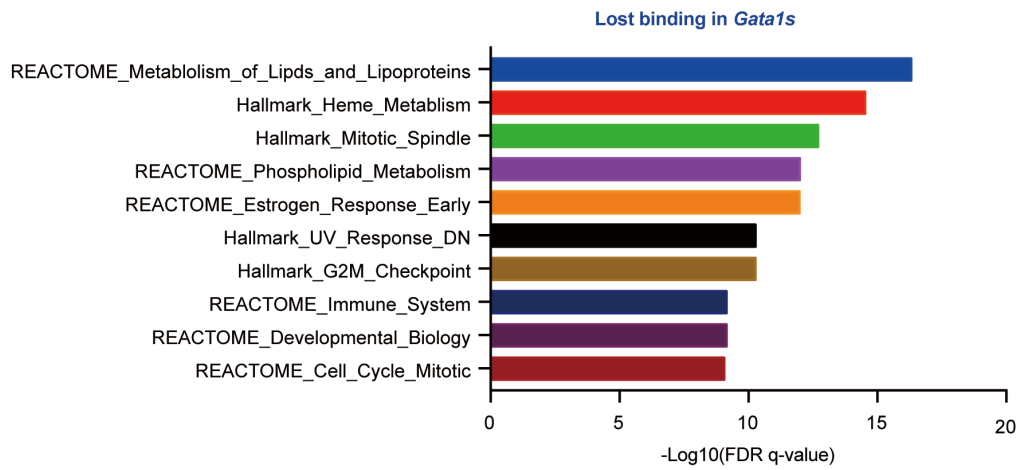

**Supplemental Figure S2**

**A** *R1/2*

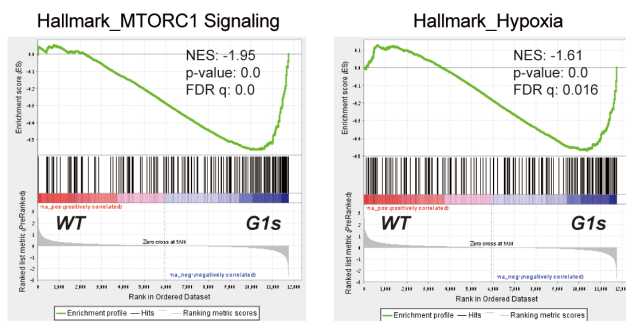

**B** *R3*

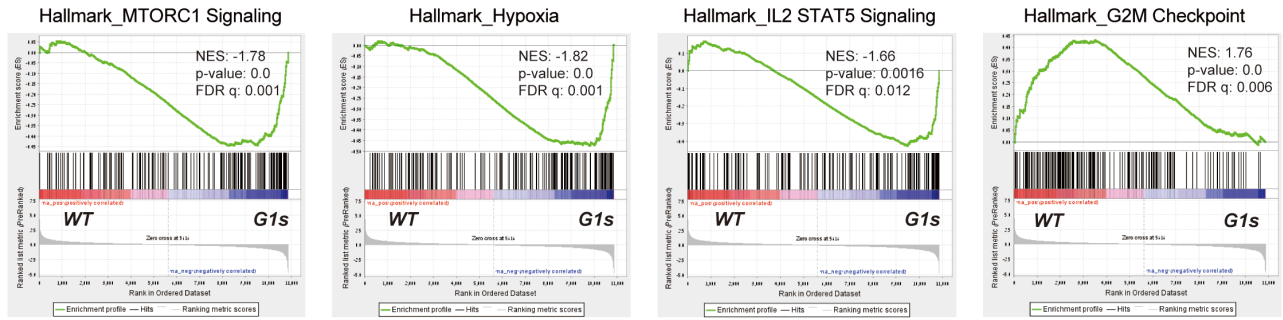



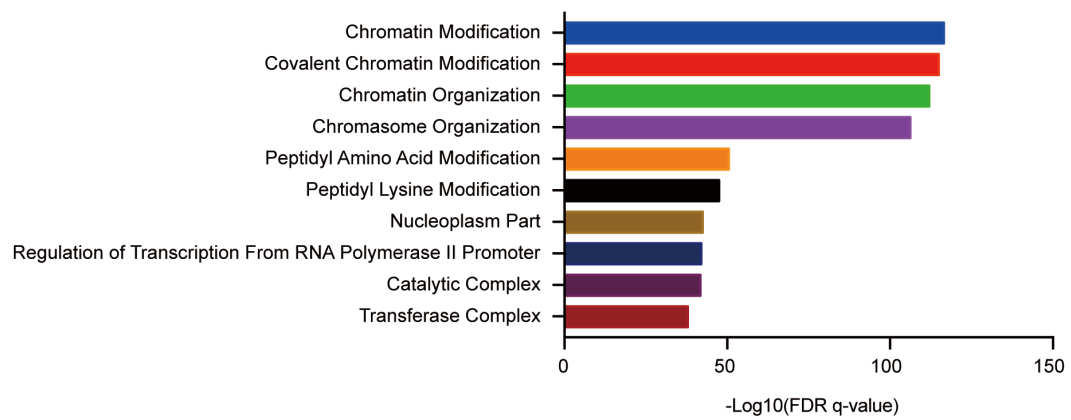

Supplemental Figure S4

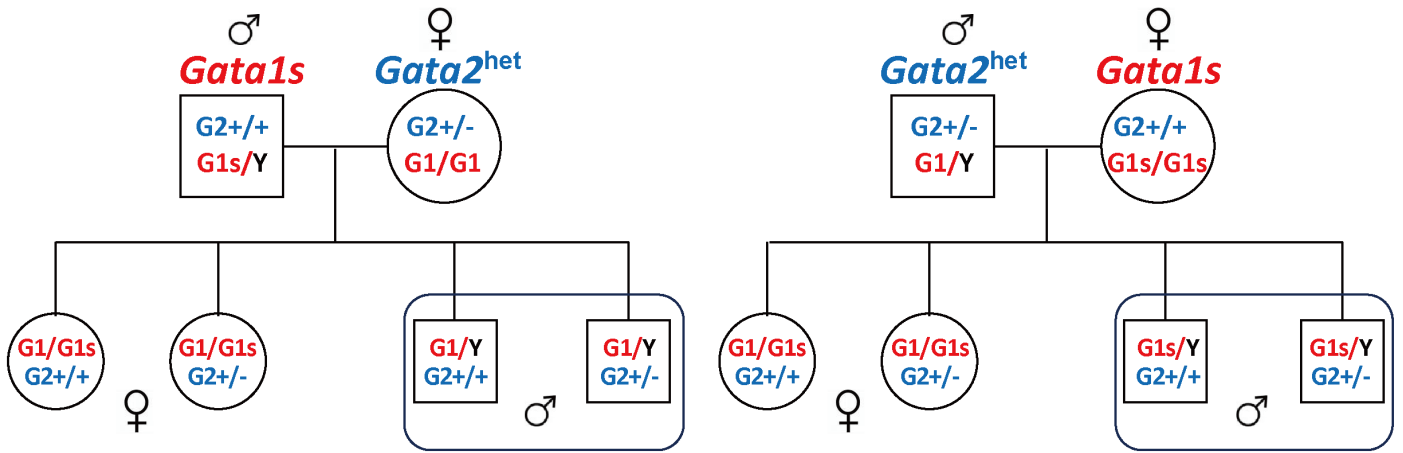

Supplemental Figure S5
